# Supplementary material for: Comprehensively evaluating the quality consistency of Forsythia suspensa by five-wavelength mean fusion fingerprint profiling combined with spectrum quantum fingerprint and antioxidant activity
Source: Royal Society of Chemistry journal article supplement (doi:10.1039/d3nj02570e), 2023-01-01
Supplement: d3nj02570e1.pdf [file d3nj02570e1.pdf]

**The supporting information contains the following contents:**

**Figure S1** The correlation of  $P_A\%$  with  $P_{ms}\%$ .

**Figure S2** Partial least squares model applied to the research of the relationship between fingerprint and antioxidant activity. Y observed versus Y predicted plot for the calibration model of HPLC (A) and prediction mode of HPLC (B), Y observed versus Y predicted plot for the calibration model of UV quantum fingerprint (C) and prediction mode of UV quantum fingerprint (D).

**Table S1** Absorption coefficient spectrum results of 21 batches of samples.

**Table S2** The calibration curves, linear range, LOD, LOQ for FA, RT and PR.

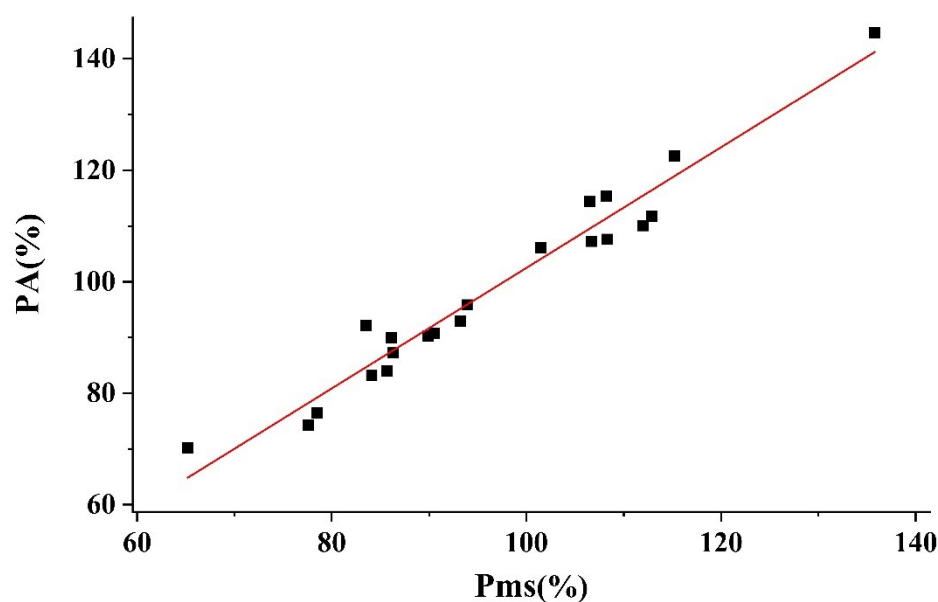

**Figure S1** The correlation of  $P_A\%$  with  $P_{ms}\%$

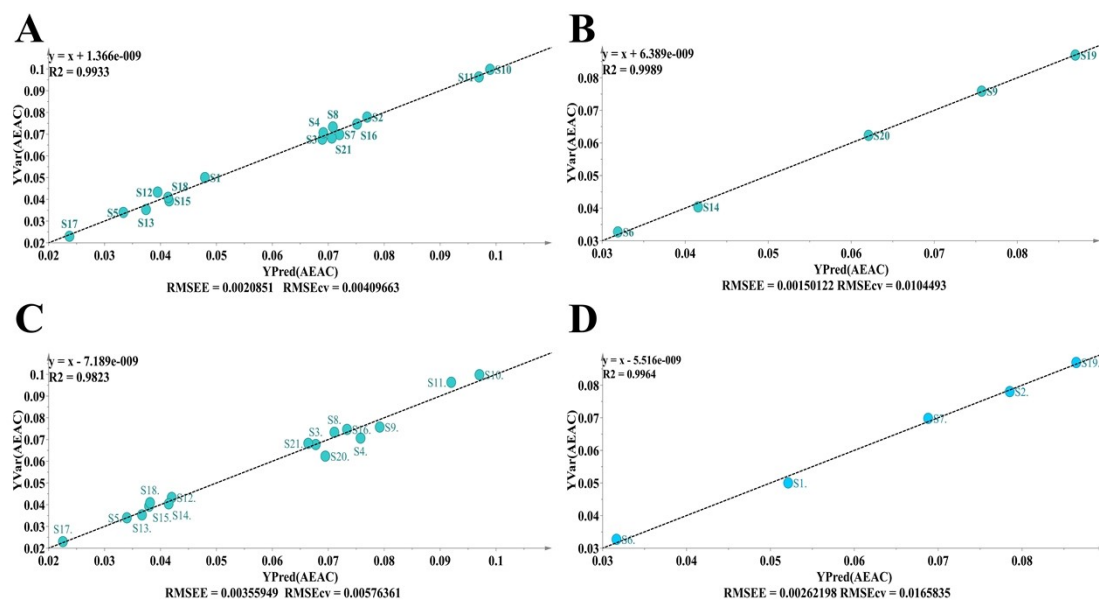

**Figure S2** Partial least squares model applied to the research of the relationship between fingerprint and antioxidant activity. Y observed versus Y predicted plot for the calibration model of HPLC (A) and prediction mode of HPLC (B), Y observed versus Y predicted plot for the calibration model of UV quantum fingerprint (C) and prediction mode of UV quantum fingerprint (D).

**Table S1** Absorption coefficient spectrum results of 21 batches of samples

| Gr.No. | G1    | G2    | G3    | G4    | G5    | G6    | G7    | G8    | G9    | G10   | $S_{ms}$ | $P_{ms}\%$ | Grade |
|--------|-------|-------|-------|-------|-------|-------|-------|-------|-------|-------|----------|------------|-------|
| S1     | 1.005 | 1.009 | 0.997 | 0.982 | 0.991 | 1.001 | 1.098 | 0.923 | 0.852 | 0.958 | 0.998    | 98.100     | 1.000 |
| S2     | 0.980 | 0.996 | 1.026 | 0.968 | 0.994 | 1.001 | 0.872 | 1.157 | 0.825 | 0.978 | 0.996    | 96.200     | 1.000 |
| S3     | 0.980 | 0.996 | 1.009 | 0.965 | 1.007 | 1.000 | 0.946 | 1.135 | 0.797 | 0.990 | 0.997    | 97.800     | 1.000 |
| S4     | 0.987 | 1.008 | 0.959 | 0.969 | 1.008 | 1.000 | 1.071 | 1.025 | 0.738 | 0.980 | 0.997    | 97.500     | 1.000 |
| S5     | 1.018 | 1.011 | 0.999 | 1.062 | 0.961 | 1.003 | 0.837 | 0.950 | 0.851 | 1.008 | 0.998    | 96.600     | 1.000 |
| S6     | 1.020 | 0.983 | 0.981 | 1.067 | 0.957 | 1.003 | 1.084 | 0.944 | 0.859 | 1.008 | 0.998    | 99.100     | 1.000 |
| S7     | 0.981 | 0.998 | 0.926 | 0.961 | 1.003 | 0.998 | 0.905 | 1.075 | 0.963 | 0.984 | 0.999    | 98.100     | 1.000 |
| S8     | 0.981 | 0.997 | 1.022 | 0.962 | 1.014 | 0.998 | 0.925 | 1.078 | 2.792 | 1.150 | 0.957    | 113.400    | 3.000 |
| S9     | 0.981 | 0.997 | 0.957 | 0.962 | 1.014 | 0.998 | 0.882 | 1.079 | 2.537 | 1.113 | 0.964    | 110.600    | 3.000 |
| S10    | 0.982 | 1.011 | 0.991 | 0.958 | 1.021 | 0.999 | 1.068 | 1.108 | 0.841 | 0.998 | 0.998    | 99.700     | 1.000 |
| S11    | 0.982 | 1.010 | 1.004 | 0.958 | 1.020 | 0.999 | 1.066 | 1.115 | 0.837 | 0.981 | 0.998    | 99.400     | 1.000 |
| S12    | 1.017 | 0.988 | 1.005 | 1.125 | 0.963 | 1.002 | 1.084 | 0.807 | 0.823 | 1.004 | 0.995    | 97.700     | 1.000 |
| S13    | 1.011 | 0.984 | 1.005 | 0.906 | 0.956 | 1.001 | 1.109 | 1.046 | 0.815 | 0.998 | 0.997    | 98.000     | 1.000 |
| S14    | 0.980 | 1.002 | 1.012 | 1.003 | 0.972 | 1.000 | 0.947 | 1.084 | 0.750 | 0.963 | 0.996    | 96.600     | 1.000 |
| S15    | 1.012 | 1.011 | 0.992 | 1.127 | 0.962 | 1.002 | 1.138 | 0.953 | 0.827 | 0.981 | 0.997    | 100.100    | 1.000 |
| S16    | 0.977 | 0.994 | 1.027 | 0.969 | 1.154 | 1.000 | 1.008 | 1.107 | 0.898 | 0.968 | 0.998    | 101.200    | 1.000 |
| S17    | 1.138 | 0.997 | 1.013 | 1.008 | 1.016 | 1.001 | 0.748 | 0.578 | 0.293 | 0.795 | 0.965    | 82.000     | 4.000 |
| S18    | 0.989 | 0.998 | 1.006 | 0.979 | 0.980 | 0.999 | 1.084 | 0.935 | 0.881 | 1.074 | 0.998    | 99.100     | 1.000 |
| S19    | 0.991 | 1.007 | 0.998 | 0.954 | 0.992 | 1.000 | 1.084 | 0.830 | 0.867 | 1.024 | 0.997    | 97.200     | 1.000 |

|     |       |       |       |       |       |       |       |       |       |       |       |         |       |
|-----|-------|-------|-------|-------|-------|-------|-------|-------|-------|-------|-------|---------|-------|
| S20 | 0.985 | 1.010 | 1.068 | 0.958 | 1.013 | 1.000 | 1.088 | 0.951 | 0.904 | 1.035 | 0.999 | 100.100 | 1.000 |
| S21 | 0.979 | 1.009 | 1.034 | 0.967 | 1.047 | 0.999 | 0.877 | 1.089 | 1.166 | 0.998 | 0.998 | 101.500 | 1.000 |

**Table S2** The calibration curves, linear range, LOD, LOQ for FA, RT and PR.

| Analyte | Calibration curve      | r      | Linear range ( $\mu\text{g/mL}$ ) | LOD <sup>a</sup><br>( $\mu\text{g ml}^{-1}$ ) | LOQ <sup>b</sup><br>( $\mu\text{g ml}^{-1}$ ) |
|---------|------------------------|--------|-----------------------------------|-----------------------------------------------|-----------------------------------------------|
| FA      | $y = 1084.6x - 91.302$ | 0.9991 | 69.21 ~ 209.72                    | 69.207                                        | 209.72                                        |
| RT      | $y = 104.43x + 10.646$ | 0.9999 | 2.12 ~ 6.42                       | 2.118                                         | 6.418                                         |
| PR      | $y = 34.873x + 4.4195$ | 0.9991 | 3.64 ~ 11.02                      | 3.637                                         | 11.021                                        |

a LOD: limit of detection.

b LOQ: limit of quantification.
